# Supplementary material for: Spin canting and metamagnetism in the two azido-bridged 1D complexes [Ni(3,5-dmpy)2(N3)2]n and [Co1.5(3,5-dmpy)3(N3)3]n
Source: Royal Society of Chemistry journal article supplement (doi:10.1039/c2ce25174d), 2012-01-01
Supplement: c2ce25174d.pdf [file c2ce25174d.pdf]

## Spin canting and metamagnetism in two azido-bridged 1-D complexes [Ni(3,5-dmpy)<sub>2</sub>(N<sub>3</sub>)<sub>2</sub>]<sub>n</sub> and [Co<sub>1.5</sub>(3,5-dmpy)<sub>3</sub>(N<sub>3</sub>)<sub>3</sub>]<sub>n</sub>

Chunhua Fan,<sup>†</sup> Patrick Gamez,<sup>§</sup> Hui-Zhong Kou,<sup>‡</sup> and Zhengliang Lu<sup>\*,†</sup>

### Table of Contents

---

|                                                                                                                                                                             |   |
|-----------------------------------------------------------------------------------------------------------------------------------------------------------------------------|---|
| Figure S1. Representation of layer packing of 1. All H atoms, except those involved in hydrogen bonding, are omitted for clarity.                                           | 2 |
| Figure S2. Representation of the crystal packing of 1 showing a hydrogen-bonded 2D layer. All H atoms, except those involved in hydrogen bonding, are omitted for clarity.  | 2 |
| Figure S3 Representation of the crystal packing of 1 showing a hydrogen-bonded 3D network. All H atoms, except those involved in hydrogen bonding, are omitted for clarity. | 3 |
| Figure S4. Plot of the field dependence for complex 2 at 2 K.                                                                                                               | 3 |

---

<sup>†</sup> School of chemistry and chemical engineering, University of Jinan, Jinan 250022, P. R. China

<sup>§</sup> ICREA and Departament de Química Inorgànica, Universitat de Barcelona, Martí i Franquès 1-11, 08028 Barcelona, Spain

<sup>‡</sup> Department of Chemistry, Tsinghua University, Beijing 100084, P. R. China

Email: [chm\\_luzl@ujn.edu.cn](mailto:chm_luzl@ujn.edu.cn)

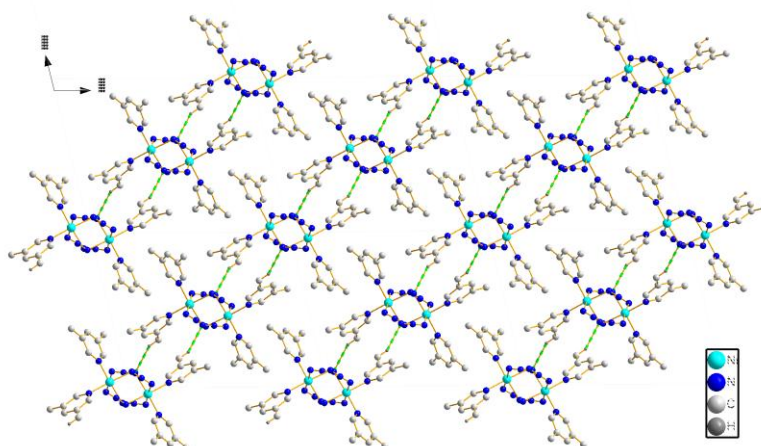

**Figure S1.** Representation of layer packing of **1**. All H atoms, except those involved in hydrogen bonding, are omitted for clarity.

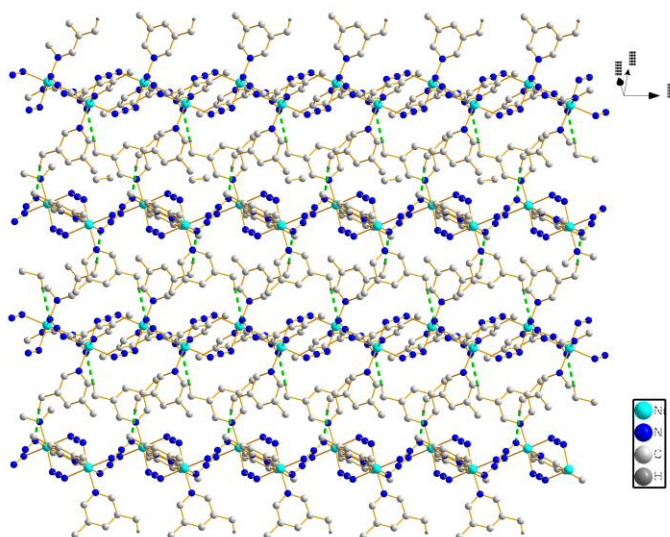

**Figure S2.** Representation of the crystal packing of **1** showing a hydrogen-bonded 2D layer. All H atoms, except those involved in hydrogen bonding, are omitted for clarity.

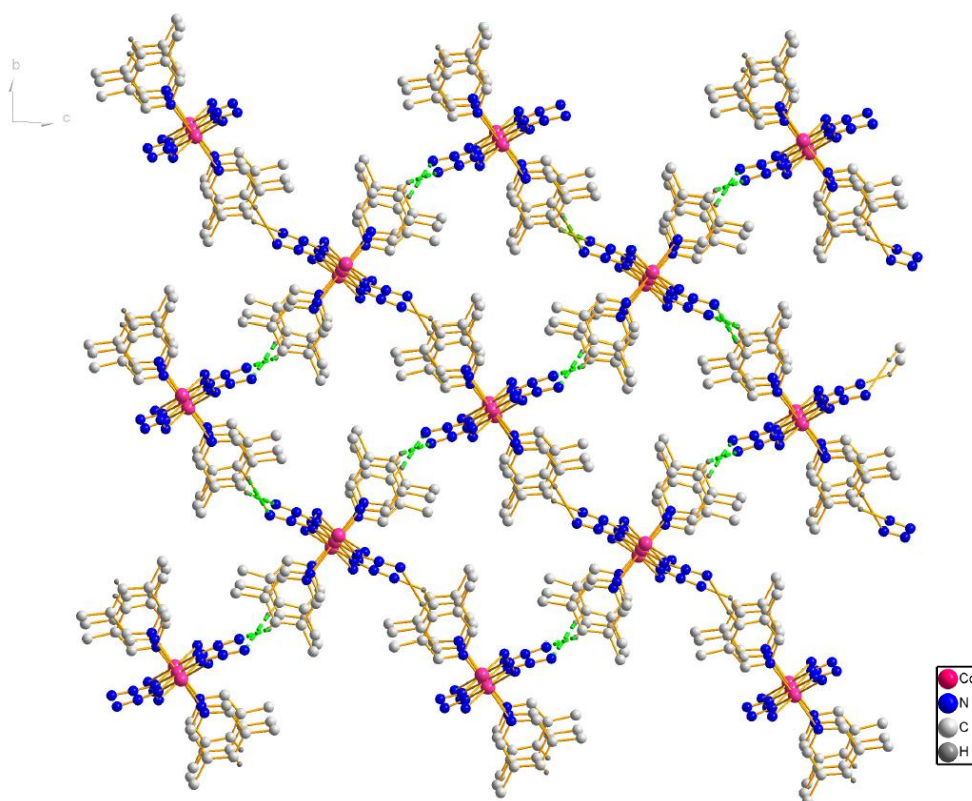

**Figure S3.** Representation of the crystal packing of 2 showing a hydrogen-bonded 3D network. All H atoms, except those involved in hydrogen bonding, are omitted for clarity.

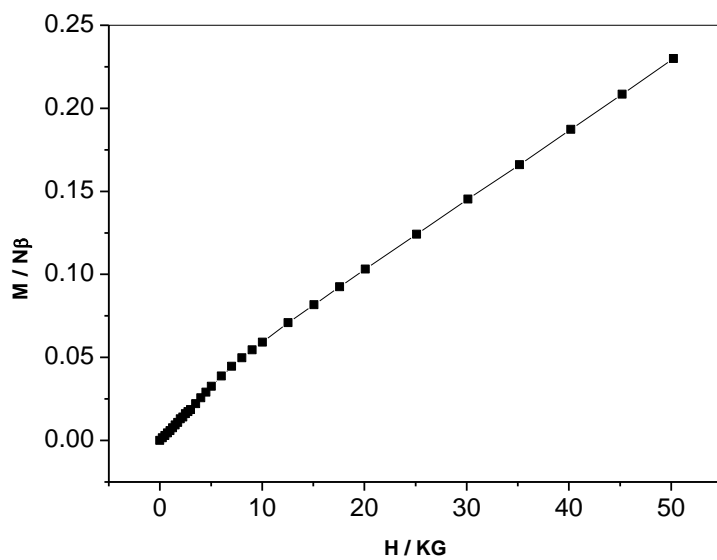

**Figure S4.** Plot of the field dependence for complex 2 at 2 K.
